# Supplementary material
Source: MDPI journal article supplement (https://www.mdpi.com/1424-2818/16/5/257)
Supplement: s1 [file s1]

**Group[ 1 ] n: 1 ;id:** CHIXJ084–18|*Stenochironomus* sp. 2XL|BOLD:ADL5584

**Group[ 2 ] n: 16 ;id:** NLCH226–20|*Stenochironomus okialbus*|BOLD:ADC5272

CHIXJ075–18|*Stenochironomus okialbus*|BOLD:ADC5272 CBLCH054–21|

*Stenochironomus okialbus*|BOLD:ADC5272 CHIXJ028–17|*Stenochironomus*

*okialbus*|BOLD:ADC5272 CBLCH059–21|*Stenochironomus okialbus*|

BOLD:ADC5272 NLCH966–21|*Stenochironomus okialbus*|BOLD:ADC5272

CBLCH089–21|*Stenochironomus okialbus*|BOLD:ADC5272 ZHECH245–21|

*Stenochironomus okialbus*|BOLD:ADC5272 ZHECH244–21|*Stenochironomus*

*okialbus*|BOLD:ADC5272 ZHECH219–21|*Stenochironomus okialbus*|

BOLD:ADC5272 CHIXJ015–17|*Stenochironomus okialbus*|BOLD:ADC5272

CHCHI2050–20|*Stenochironomus okialbus*|BOLD:ADC5272 CHIXJ059–17|

*Stenochironomus okialbus*|BOLD:ADC5272 NLCH960–21|*Stenochironomus*

*okialbus*|BOLD:ADC5272 CHIXJ011–16|*Stenochironomus okialbus*|

BOLD:ADC5272 CHCHI243–19|*Stenochironomus okialbus*|BOLD:ADC5272

**Group[ 3 ] n: 10 ;id:** DWS403–22|*Stenochironomus* sp. 8XL|BOLD:AET9193

DWS399–22|*Stenochironomus* sp. 8XL|BOLD:AET9193 DWS353–22|

*Stenochironomus* sp. 8XL|BOLD:AET9193 DWS404–22|*Stenochironomus* sp.

8XL|BOLD:AET9193 DWS394–22|*Stenochironomus* sp. 8XL|BOLD:AET9193

DWS388–22|*Stenochironomus* sp. 8XL|BOLD:AET9193 DWS387–22|

*Stenochironomus* sp. 8XL|BOLD:AET9193 DWS352–22|*Stenochironomus* sp.

8XL|BOLD:AET9193 DWS351–22|*Stenochironomus* sp. 8XL|BOLD:AET9193

DWS350–22|*Stenochironomus* sp. 8XL|BOLD:AET9193

**Group[ 4 ] n: 19 ;id:** DWS154–21|*Stenochironomus* sp. 4XL|BOLD:AEN6782

CHCHI2182–20|*Stenochironomus* sp. 4XL|BOLD:AEN6782 CHCHI113–18|

*Stenochironomus* sp. 4XL|BOLD:ADP3912 DWS184–21|*Stenochironomus* sp. 4XL|

BOLD:ADP1847 DWS110–20|*Stenochironomus* sp. 4XL|BOLD:AEN6782

DWS037–20|*Stenochironomus* sp. 4XL|BOLD:AEN6782 CHCHI402–19|

*Stenochironomus* sp. 4XL|BOLD:AEN6782 DWS186–21|*Stenochironomus* sp. 4XL|

BOLD:AEN6782 DWS183–21|*Stenochironomus* sp. 4XL|BOLD:AEN6782

DWS175–21|*Stenochironomus* sp. 4XL|BOLD:AEN6782 DWS164–21|

*Stenochironomus* sp. 4XL|BOLD:AEN6782 DWS163–21|*Stenochironomus* sp. 4XL|

CHGX260–22|*Stenochironomus* sp. 4XL|BOLD:AEN6782 CHCHI114–18|

*Stenochironomus* sp. 4XL|BOLD:ADP1847 CHCHI1318–19|*Stenochironomus* sp.

4XL|BOLD:ADP1847 CHCHI1311–19|*Stenochironomus* sp. 4XL|BOLD:AEN6782

CHCHI1298–19|*Stenochironomus* sp. 4XL|BOLD:AEN6782 CHCHI1295–19|

*Stenochironomus* sp. 4XL|BOLD:ADP3912 CHCHI1282–19|*Stenochironomus* sp.

4XL|BOLD:ADP3912

**Group[ 5 ] n: 13 ;id:** CHCHI1111–19|*Stenochironomus* sp. 22XL|BOLD:ADD7020

CBLCH060–21|*Stenochironomus* sp. 22XL|BOLD:ADD7020 CBLCH039–21|

*Stenochironomus* sp. 22XL|BOLD:ADD7020 NLCH021–20|*Stenochironomus* sp.

22XL|BOLD:ADD7020 CHNGZ003–20|*Stenochironomus* sp. 22XL|

BOLD:ADD7020 CHIXJ016–17|*Stenochironomus* sp. 22XL|BOLD:ADD7020  
NLCH787–20|*Stenochironomus* sp. 22XL|BOLD:ADD7020 CHIXJ027–17|  
*Stenochironomus* sp. 22XL|BOLD:ADD7020 CHIXJ025–17|*Stenochironomus* sp.  
22XL|BOLD:ADD7020 CHIXJ024–17|*Stenochironomus* sp. 22XL|BOLD:ADD7020  
CHIXJ023–17|*Stenochironomus* sp. 22XL|BOLD:ADD7020 CHCHI249–19|  
*Stenochironomus* sp. 22XL|BOLD:ADD7020 TANCH285–16|*Stenochironomus* sp.  
22XL|BOLD:ADD7020

**Group[ 6 ] n: 13 ;id:** CHCHI1721–20|*Stenochironomus* sp. 15XL|BOLD:AEC1431  
NLCH137–20|*Stenochironomus* sp. 15XL|BOLD:AEC1431 NLCH078–20|  
*Stenochironomus* sp. 15XL|BOLD:AEC1431 NLCH032–20|*Stenochironomus* sp.  
15XL|BOLD:AEC1431 TMCH050–20|*Stenochironomus* sp. 15XL|BOLD:AEC1431  
NLCH1059–21|*Stenochironomus* sp. 15XL|BOLD:AEC1431 CHCHI709–19|  
*Stenochironomus* sp. 15XL|BOLD:AEC1431 NLCH318–20|*Stenochironomus* sp.  
15XL|BOLD:AEC1431 CHCHI1782–20|*Stenochironomus* sp. 15XL|BOLD:AEC1431  
NLCH963–21|*Stenochironomus* sp. 15XL|BOLD:AEC1431 CHCHI3896–21|  
*Stenochironomus* sp. 15XL|BOLD:AEC1431 CHCHI3894–21|*Stenochironomus* sp.  
15XL|BOLD:AEC1431 CHCHI1966–20|*Stenochironomus* sp. 15XL|BOLD:AEC1431

**Group[ 7 ] n: 7 ;id:** ZHECH226–21|*Stenochironomus baishanzuensis*  
BOLD:AEC0207 NLCH802–20|*Stenochironomus baishanzuensis*|BOLD:AEL2939  
ZHECH247–21|*Stenochironomus baishanzuensis*|BOLD:AEC0207 ZHECH246–21|  
*Stenochironomus baishanzuensis*|BOLD:AEC0207 CHCHI1239–19|  
*Stenochironomus baishanzuensis*|BOLD:AEL2939 NLCH788–20|  
*Stenochironomus baishanzuensis*|BOLD:AEL2939 CHCHI1678–20|  
*Stenochironomus baishanzuensis*|BOLD:AEC0207

**Group[ 8 ] n: 7 ;id:** NLCH171–20|*Stenochironomus hainanus*|BOLD:AEJ4351  
NLCH169–20|*Stenochironomus hainanus*|BOLD:AEJ4351 NLCH107–20|  
*Stenochironomus hainanus*|BOLD:AEJ4351 NLCH049–20|*Stenochironomus*  
*hainanus*|BOLD:AEJ4351 DWS405–22|*Stenochironomus hainanus*|BOLD:AEJ4351  
CHCHI033–16|*Stenochironomus hainanus*|BOLD:ADF2136 DWS357–22|  
*Stenochironomus hainanus*|BOLD:AEJ4351

**Group[ 9 ] n: 1 ;id:** CHCHI557–19|*Stenochironomus* sp. 19XL|BOLD:AFN3854

**Group[ 10 ] n: 1 ;id:** CHCHI554–19|*Stenochironomus* sp. 5XL|BOLD:AFO9027

**Group[ 11 ] n: 4 ;id:** CHCHI1680–20|*Stenochironomus macateei*|BOLD:ADL5641  
CHCHI3471–21|*Stenochironomus macateei*|BOLD:ADL5641 CHIXJ088–18|  
*Stenochironomus macateei*|BOLD:ADL5641 CHIXJ087–18|*Stenochironomus*  
*macateei*|BOLD:ADL5641

**Group[ 12 ] n: 12 ;id:** NLCH164–20|*Stenochironomus linanensis*|BOLD:AEG1837  
NLCH157–20|*Stenochironomus linanensis*|BOLD:AEG1837 NLCH147–20|  
*Stenochironomus linanensis*|BOLD:AEG1837 NLCH088–20|*Stenochironomus*  
*linanensis*|BOLD:AEG1837 NLCH076–20|*Stenochironomus linanensis*|  
BOLD:AEG1837 NLCH028–20|*Stenochironomus linanensis*|BOLD:AEG1837

ZHECH251–21|*Stenochironomus linanensis*|BOLD:AEG1837 ZHECH249–21|*Stenochironomus linanensis*|BOLD:AEG1837 ZHECH224–21|*Stenochironomus linanensis*|BOLD:AEG1837 NLCH1029–21|*Stenochironomus linanensis*|BOLD:AEG1837 CHCHI1823–20|*Stenochironomus linanensis*|BOLD:AEG1837 NLCH1058–21|*Stenochironomus linanensis*|BOLD:AEG1837  
**Group[ 13 ] n: 2** ;id: CHCHI549–19|*Stenochironomus* sp. 3XL|BOLD:ADH0471 CHCHI112–18|*Stenochironomus* sp. 3XL|BOLD:ADH0471  
**Group[ 14 ] n: 3** ;id: NLCH145–20|*Stenochironomus* sp. 9XL|BOLD:AEJ1073 NLCH957–21|*Stenochironomus* sp. 9XL|BOLD:AEJ1073 NLCH1094–21|*Stenochironomus* sp. 9XL|BOLD:AEJ1073  
**Group[ 15 ] n: 3** ;id: DWS125–20|*Stenochironomus okialbus*|BOLD:AEG6557 DWS020–20|*Stenochironomus okialbus*|BOLD:AEG6557 DWS019–20|*Stenochironomus okialbus*|BOLD:AEG6557  
**Group[ 16 ] n: 3** ;id: DWS114–20|*Stenochironomus zhengi*|BOLD:AEG5343 DWS094–20|*Stenochironomus zhengi*|BOLD:AEG5343 DWS054–20|*Stenochironomus zhengi*|BOLD:AEG5343  
**Group[ 17 ] n: 5** ;id: CHCHI970–19|*Stenochironomus* sp. 11XL|BOLD:AEC0226 DWS052–20|*Stenochironomus* sp. 11XL|BOLD:AEC0226 DWS130–20|*Stenochironomus* sp. 11XL|BOLD:AEC0226 DWS161–21|*Stenochironomus* sp. 11XL|BOLD:AEC0226 DWS162–21|*Stenochironomus* sp. 11XL|BOLD:AEC0226  
**Group[ 18 ] n: 5** ;id: CHCHI1925–20|*Stenochironomus* sp. 17XL|BOLD:AEB9437 CHCHI369–19|*Stenochironomus* sp. 17XL|BOLD:AEB9437 CHCHI367–19|*Stenochironomus* sp. 17XL|BOLD:AEB9437 SCCH113–20|*Stenochironomus* sp. 17XL|BOLD:AEB9437 CHCHI3897–21|*Stenochironomus* sp. 17XL|BOLD:AEB9437  
**Group[ 19 ] n: 1** ;id: NLCH1030–21|*Stenochironomus* sp. 21XL|BOLD:AEN0410  
**Group[ 20 ] n: 2** ;id: CHCHI491–19|*Stenochironomus* sp. 13XL|BOLD:AEC0447 CHCHI2292–20|*Stenochironomus* sp. 13XL|BOLD:AEC0447  
**Group[ 21 ] n: 1** ;id: CHCHI2599–20|*Stenochironomus* sp. 14XL|BOLD:ADH0702  
**Group[ 22 ] n: 1** ;id: DWS067–20|*Stenochironomus* sp. 12XL|BOLD:AEG5841  
**Group[ 23 ] n: 1** ;id: DWS051–20|*Stenochironomus* sp. 8XL|BOLD:AEG5843  
**Group[ 24 ] n: 8** ;id: CHCHI2003–20|*Stenochironomus annulus*|BOLD:ADK3619 CHCHI3062–20|*Stenochironomus annulus*|BOLD:ADK3619 ZHECH223–21|*Stenochironomus annulus*|BOLD:ADK3619 ZHECH222–21|*Stenochironomus annulus*|BOLD:ADK3619 ZHECH220–21|*Stenochironomus annulus*|BOLD:ADK3619 CHCHI3658–21|*Stenochironomus annulus*|BOLD:ADK3619 CHCHI1229–19|*Stenochironomus annulus*|BOLD:ADK3619 CHIXJ021–17|*Stenochironomus annulus*|BOLD:ADK3619  
**Group[ 25 ] n: 15** ;id: YHJ287–19|*Stenochironomus* sp. 1XL|BOLD:ADK4980 CHCHI2563–20|*Stenochironomus* sp. 1XL|BOLD:ADK4980 YHJ017–18|*Stenochironomus* sp. 1XL|BOLD:ADK4980 YHJ016–18|*Stenochironomus* sp. 1XL|BOLD:ADK4980 CHCHI2351–20|*Stenochironomus* sp. 1XL|BOLD:ADK4980

CHNGZ160–20|*Stenochironomus* sp. 1XL|BOLD:ADK4980 CHNGZ145–20|  
*Stenochironomus* sp. 1XL|BOLD:ADK4980 CHIXJ030–17|*Stenochironomus* sp.  
1XL|BOLD:ADK4980 CHIXJ031–17|*Stenochironomus* sp. 1XL|BOLD:ADK4980  
CHIXJ029–17|*Stenochironomus* sp. 1XL|BOLD:ADK4980 CHNGZ233–20|  
*Stenochironomus* sp. 1XL|BOLD:ADK4980 CHNGZ199–20|*Stenochironomus* sp.  
1XL|BOLD:ADK4980 CHNGZ198–20|*Stenochironomus* sp. 1XL|BOLD:ADK4980  
CHNGZ194–20|*Stenochironomus* sp. 1XL|BOLD:ADK4980 DTH024–22|  
*Stenochironomus* sp. 1XL|BOLD:ADK4980

**Group[ 26 ] n: 2 ;id:** DWS035–20|*Stenochironomus* sp. 20XL|BOLD:AEN7975  
DWS421–22|*Stenochironomus* sp. 20XL|BOLD:AEN7975

**Group[ 27 ] n: 8 ;id:** CHCHI3068–20|*Stenochironomus* sp. 6XL|BOLD:AEC0006  
CHCHI2851–20|*Stenochironomus* sp. 6XL|BOLD:AEC0006 CHCHI1288–19|  
*Stenochironomus* sp. 6XL|BOLD:AEC0006 CHCHI1316–19|*Stenochironomus* sp.  
6XL|BOLD:AEC0006 CHCHI1310–19|*Stenochironomus* sp. 6XL|BOLD:AEC0006  
CHCHI1307–19|*Stenochironomus* sp. 6XL|BOLD:AEC0006 CHCHI1284–19|  
*Stenochironomus* sp. 6XL|BOLD:AEC0006 CHCHI1281–19|*Stenochironomus* sp.  
6XL|BOLD:AEC0006

**Group[ 28 ] n: 6 ;id:** CHGX558–22|*Stenochironomus* sp. 11XL|BOLD:AEO0097  
CHGX547–22|*Stenochironomus* sp. 11XL|BOLD:AEO0097 CHGX457–22|  
*Stenochironomus* sp. 11XL|BOLD:AEO0097 CHGX611–22|*Stenochironomus* sp.  
11XL|BOLD:AEO0097 CHGX610–22|*Stenochironomus* sp. 11XL|BOLD:AEO0097  
CHGX318–22|*Stenochironomus* sp. 11XL|BOLD:AEO0097

**Group[ 29 ] n: 2 ;id:** CHCHI351–19|*Stenochironomus* sp. 18XL|BOLD:AFN3855  
CHCHI338–19|*Stenochironomus* sp. 18XL|BOLD:AFN3855

**Group[ 30 ] n: 1 ;id:** NLCH1072–21|*Stenochironomus* sp. 7XL|BOLD:AEN0411

**Group[ 31 ] n: 1 ;id:** CHCHI166–19|*Stenochironomus tobaduodecimus*|  
BOLD:ADR4150

**Group[ 32 ] n: 1 ;id:** CHCHI2255–20|*Stenochironomus* sp. 3CZ|BOLD:AEG5592

**Group[ 33 ] n: 1 ;id:** CHCHI2971–20|*Stenochironomus* sp. 16XL|BOLD:AEG0371

**Group[ 34 ] n: 2 ;id:** DWS427–22|*Stenochironomus hainanus*|BOLD:AET5459  
DWS422–22|*Stenochironomus hainanus*|BOLD:AET5459

**Group[ 35 ] n: 1 ;id:** CHNGZ229–20|*Stenochironomus* sp. 1CZ|BOLD:AEG3938

**Group[ 36 ] n: 1 ;id:** CHCHI1294–19|*Stenochironomus* sp. 10XL|BOLD:AFO7662
