# Supplementary material
Source: MDPI journal article supplement (https://www.mdpi.com/1424-2818/16/5/257)

# BOLD TaxonID Tree

Title : Tree Result - DS-24STEN  
Date : 25-Jan-2024  
Data Type : Nucleotide  
Distance Model : Kimura 2 Parameter  
Marker : COI-5P  
Colourization : Barcode Cluster (BIN)

Label : Sample ID  
Label : Process ID  
Label : Taxon  
Label : Sex/Gender  
Label : Life Stage  
Label : Country  
Label : Province/State  
Label : Region

Sequence Count : 180  
Species count : 32  
Genus count : 1  
Family count : 1  
Unidentified : 0

BIN Count : 40

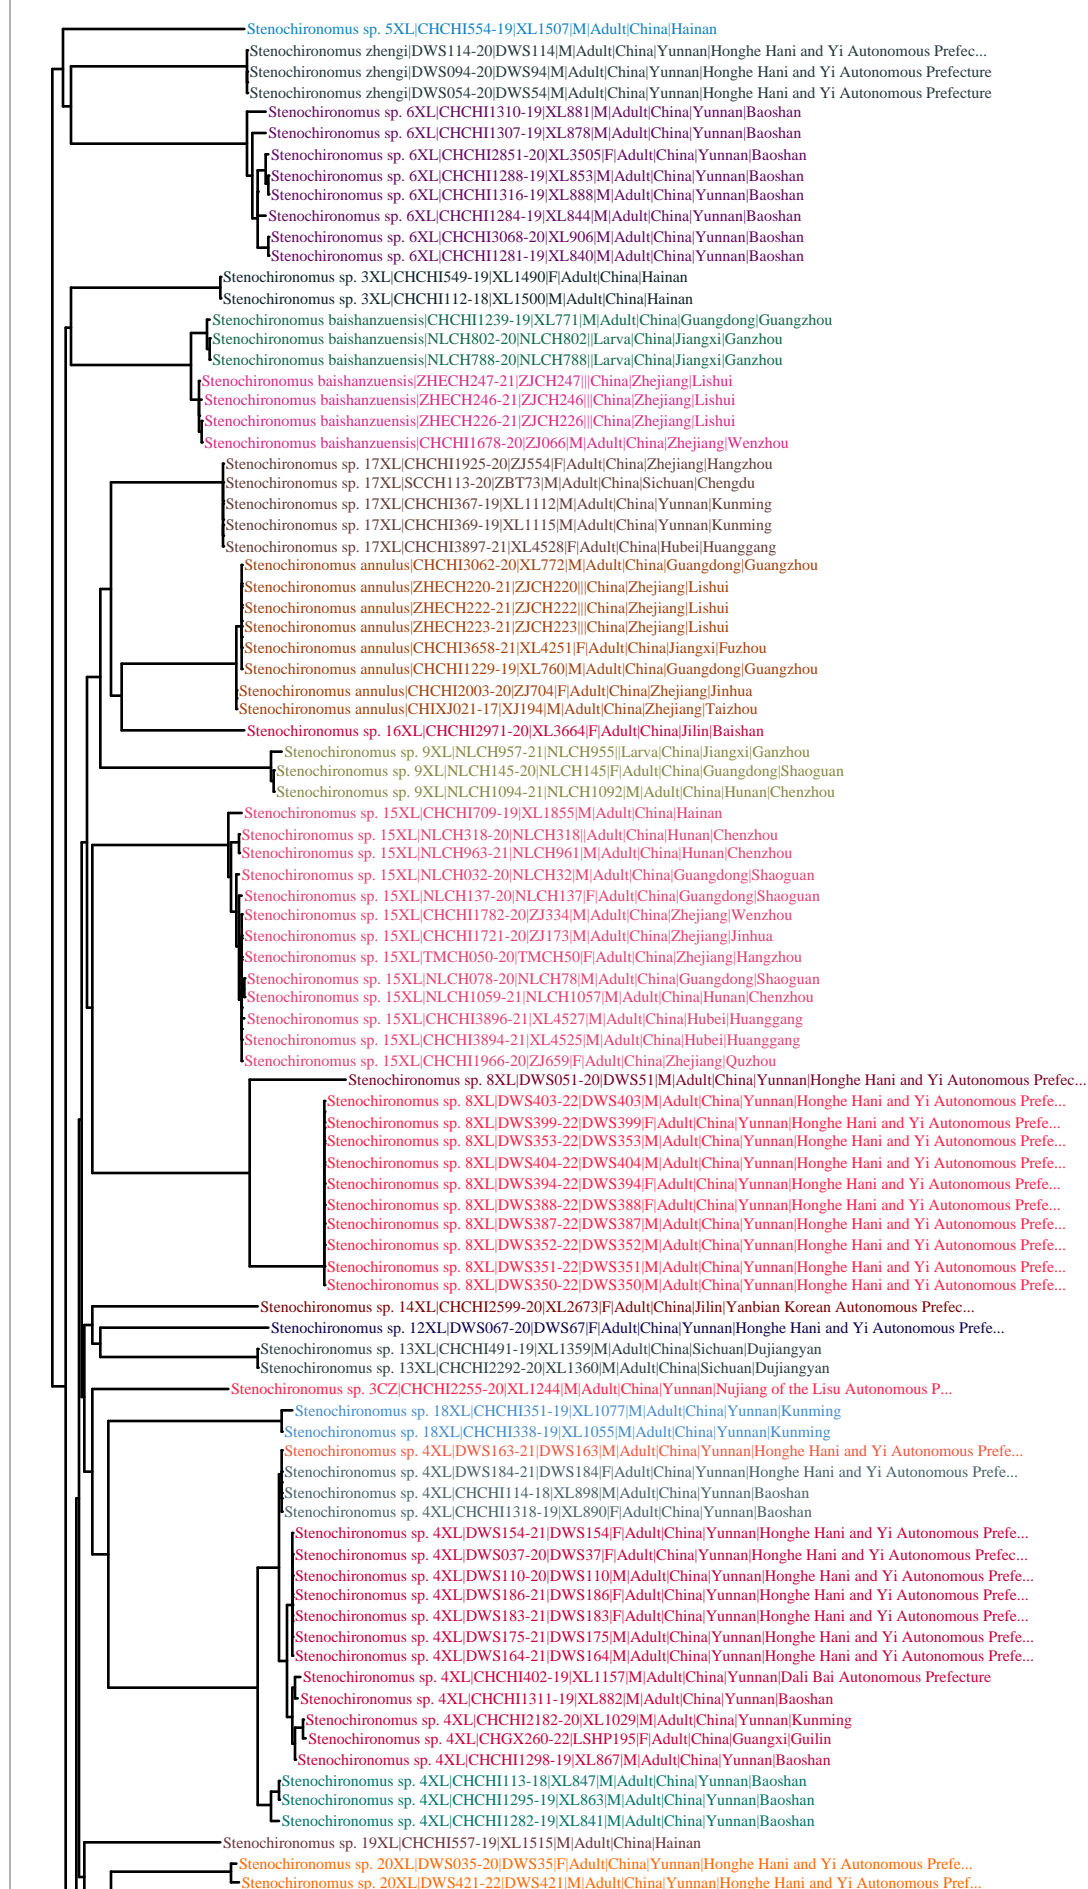

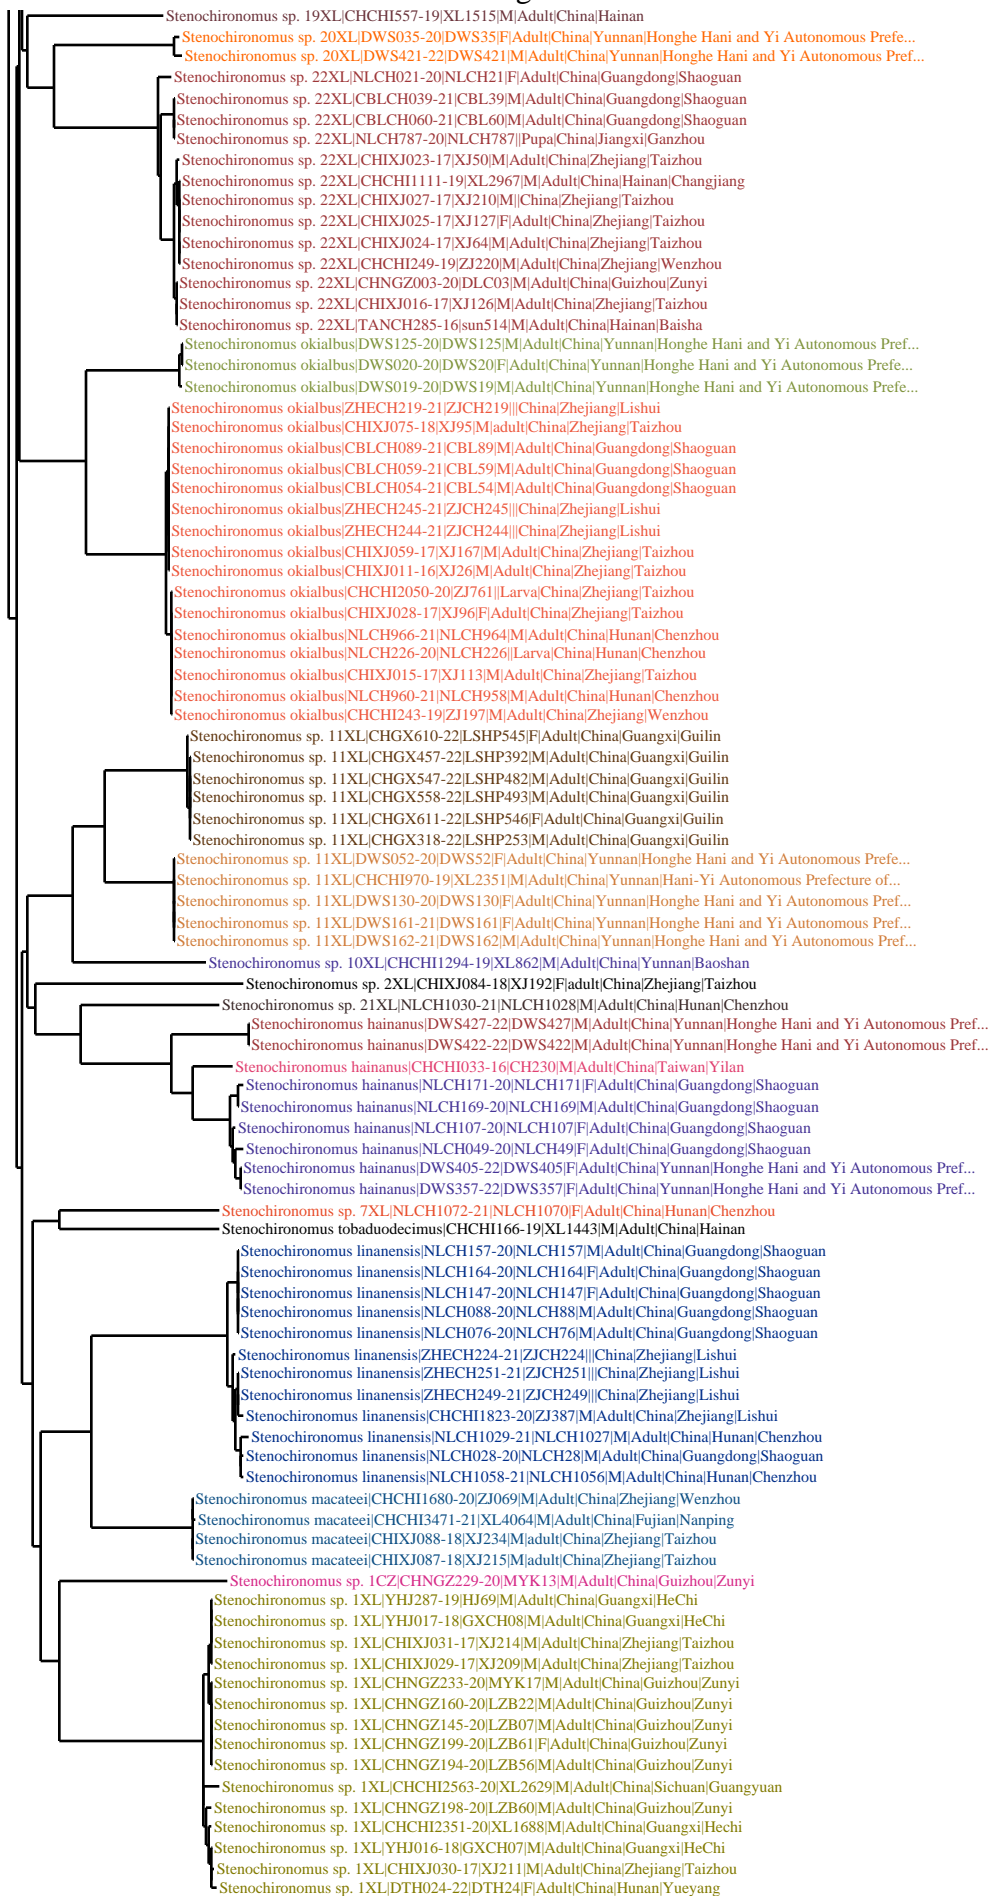

Supplement: s1 [file s1]
